# Supplementary material
Source: Springer Nature journal article supplement (https://www.springerprofessional.de/resource/supplementary/13638_2012_370_MOESM11_ESM.pdf/11897500)

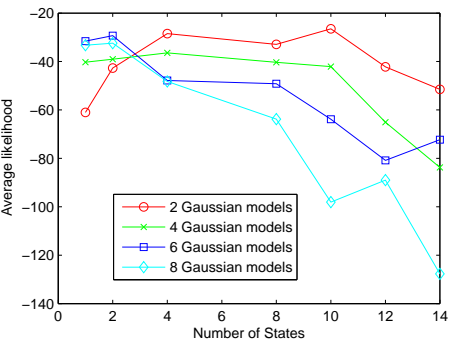

(a) Vertical activities

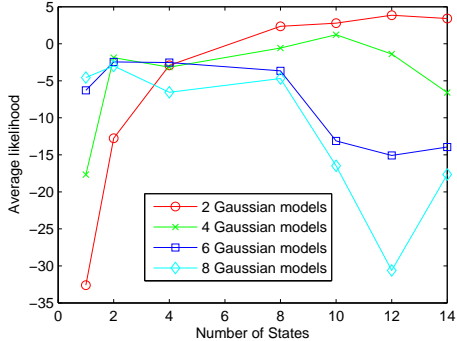

(b) Horizontal activities

Supplement: MOESM11 [file 11897500]
